# Supplementary material for: A family of anti-Bacteroidales peptide toxins wide-spread in the human gut microbiota
Source: PubMed Central journal article supplement (PMC6671954; doi:10.1038/s41467-019-11494-1), 2019-08-01
Supplement: 41467_2019_11494_MOESM1_ESM.pdf [file 41467_2019_11494_MOESM1_ESM.pdf]

Supplementary Information

**A family of anti-Bacteroidales peptide toxins wide-spread in the human gut microbiota**

Coyne, Béchon, *et al.*

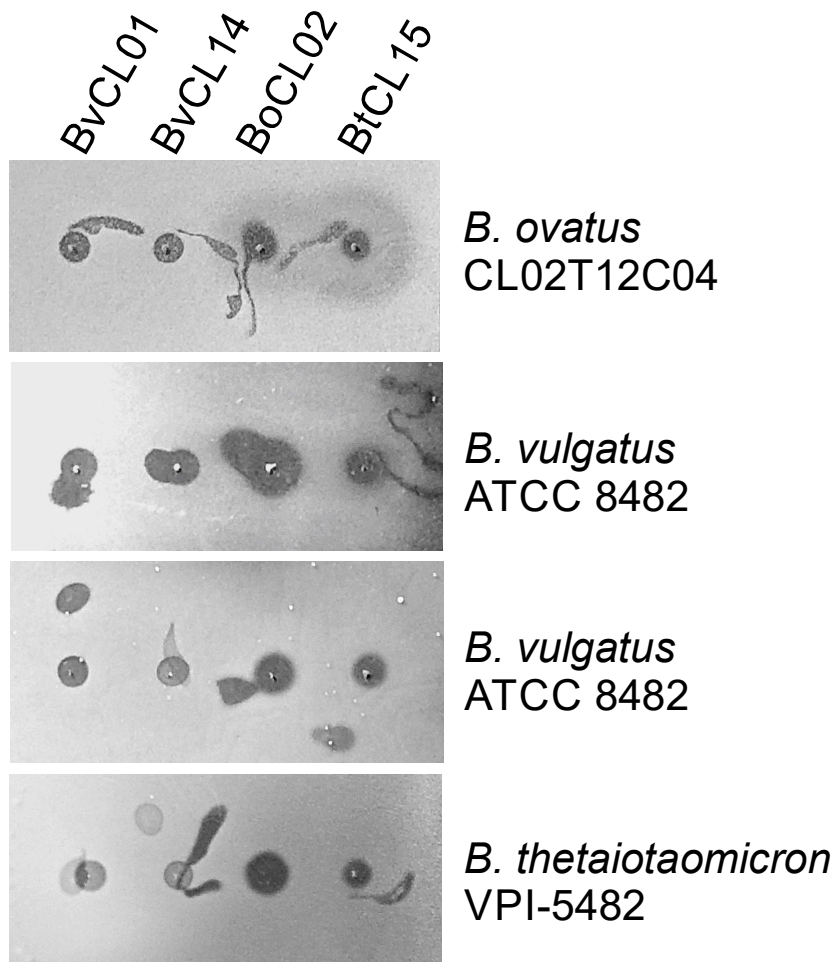

**Supplementary Figure 1.** Agar spot overlay assays demonstrating the movement of the toxin on the agar surface due to physical application of the overlay. The four toxin-producing strains are shown at the top and were cultured on the plate overnight, removed, then the plate was overlaid with top agar containing the strains shown on the left. Representative overlays are shown to illustrate the effect.

EH214\_03825 *B. vulgatus* CL01T12C17 (bacteroidetocin A)

|                                                                                                                                        | no. times seen |
|----------------------------------------------------------------------------------------------------------------------------------------|----------------|
| <b>M K K I S N E T L S Q V T G G</b> K F W G S R V E <b>C R</b> V Q A N G H <b>C M C R</b> K V Y Y R F G I R S Y G G W W P A N P S Q C | 2              |
| K F W G S                                                                                                                              | 55             |
| K F W G S R                                                                                                                            | 1              |
| K F W G S R V E                                                                                                                        | 12             |
| F W G S R                                                                                                                              | 1              |
| F W G S R V E                                                                                                                          | 11             |
| V Q A N G H                                                                                                                            | 170            |
| K V Y Y R                                                                                                                              | 89             |
| V Y Y R                                                                                                                                | 1              |
| V Y Y R F                                                                                                                              | 1              |
| V Y Y R F G I R S Y G G W                                                                                                              | 1              |
| Y R F G I R                                                                                                                            | 2              |
| R F G I R                                                                                                                              | 1              |
| F G I R S Y G G W W                                                                                                                    | 1              |
| S Y G G W W P A                                                                                                                        | 3              |
| S Y G G W W P A N                                                                                                                      | 2              |
| S Y G G W W P A N P                                                                                                                    | 2              |
| S Y G G W W P A N P S                                                                                                                  | 57             |
| <b>S Y G G W W P A N P S Q C</b>                                                                                                       | 9              |
| Y G G W W P A N P S                                                                                                                    | 1              |
| Y G G W W P A N P S Q                                                                                                                  | 1              |
| G G W W P A N P S Q                                                                                                                    | 1              |
| G W W P A N P S Q                                                                                                                      | 1              |

EH213\_01844 *B. thetaiotomicron* CL15T12C11 (bacteroidetocin B)

|                                                                                                                                 | no. times seen |
|---------------------------------------------------------------------------------------------------------------------------------|----------------|
| <b>M K K V S N K V L S R A F G G</b> K M F G S K T E C E R <b>W E G G C R C R</b> Q V Y Y T F W V K S Y G A W N P A A D W Q C N | 11             |
| K M F G S K                                                                                                                     | 9              |
| K M F G S K T E C E R                                                                                                           | 1              |
| Q V Y Y T F                                                                                                                     | 21             |
| <b>Q V Y Y T F W V K</b>                                                                                                        | 2              |
| Y T F W V K                                                                                                                     | 1              |
| T F W V K                                                                                                                       | 1              |
| S Y G A W N P A                                                                                                                 | 2              |
| S Y G A W N P A A D                                                                                                             | 4              |
| S Y G A W N P A A D W Q                                                                                                         | 6              |
| <b>S Y G A W N P A A D W Q C N</b>                                                                                              | 1              |
| G A W N P A A D W Q C N                                                                                                         | 1              |

**Supplementary Figure 2.** Fragments of bacteroidetocin A and B identified by LC-MS/MS analysis. Yellow highlight indicate residues not detected. Blue highlights are completely or partially digested tryptic fragments. Numbers on the right indicate the number of times the fragment was detected.

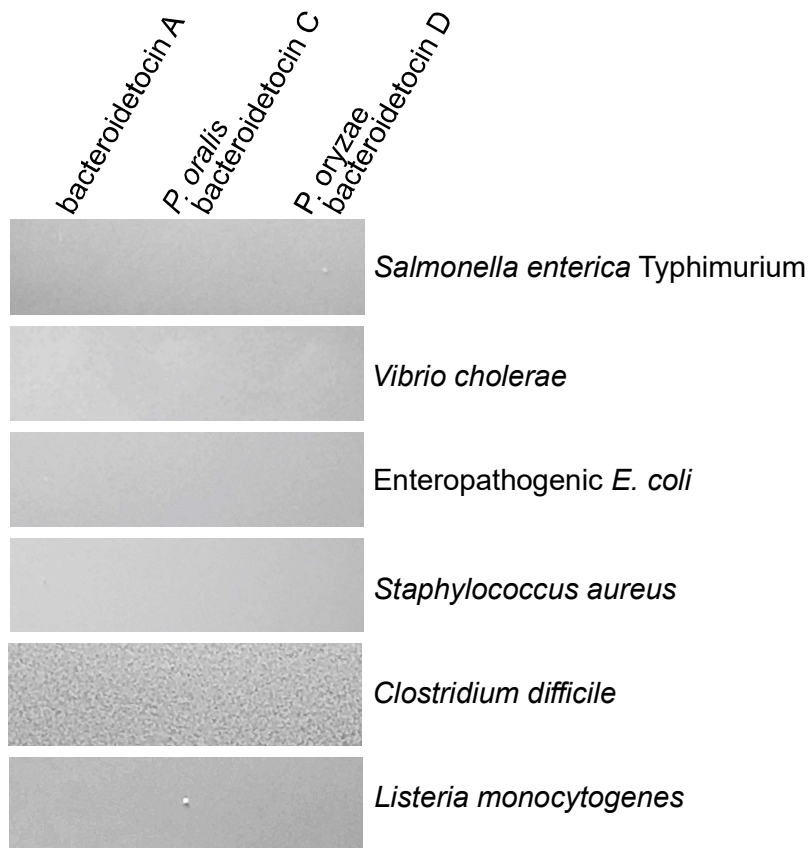

**Supplementary Figure 3.** Toxin dot assays of synthesized peptides bacteroidetocin A (left), the *Prevotella oralis* ATCC 33269 HMPREF0663\_ORF3 peptide (bacteroidetocin C) (middle), and the *Prevotella oryzae* DSM 17970 XylorDRAFT\_0090 peptide (bacteroidetocin D) (right) against bacterial pathogens of non-Bacteroidetes phyla. 1 µg of peptide was applied in a 5 µl spot on top of an agar overlay containing the indicated strains.

**Supplementary Table 1.** Strains used in this study.

| Genome name                                                  | media<br>liquid/solid | source         |
|--------------------------------------------------------------|-----------------------|----------------|
| <i>Bacteroides vulgatus</i> CL01T12C17                       | basal/BHIS            | Comstock Lab   |
| <i>Bacteroides vulgatus</i> CL14T03C19                       | basal/BHIS            | Comstock Lab   |
| <i>Bacteroides ovatus</i> CL02T12C04                         | basal/BHIS            | Comstock Lab   |
| <i>Bacteroides ovatus</i> CL02T12C04 tn mut 206              | basal/BHIS            | Comstock Lab   |
| <i>Bacteroides ovatus</i> CL02T12C04 tn mut 512              | basal/BHIS            | Comstock Lab   |
| <i>Bacteroides ovatus</i> CL02T12C04 tn mut 363              | basal/BHIS            | Comstock Lab   |
| <i>Bacteroides ovatus</i> CL02T12C04 tn mut 724              | basal/BHIS            | Comstock Lab   |
| <i>Bacteroides thetaiotaomicron</i> CL15T12C11               | basal/BHIS            | Comstock Lab   |
| <i>Bacteroides thetaiotaomicron</i> CL15T12C11 $\Delta$ 1843 | basal/BHIS            | Comstock Lab   |
| <i>Bacteroides thetaiotaomicron</i> CL15T12C11 $\Delta$ 1844 | basal/BHIS            | Comstock Lab   |
| <i>Bacteroides thetaiotaomicron</i> CL15T12C11 $\Delta$ 1845 | basal/BHIS            | Comstock Lab   |
| <i>Bacteroides thetaiotaomicron</i> VPI 5482                 | basal/BHIS            | ATCC           |
| <i>Bacteroides vulgatus</i> ATCC 8482                        | basal/BHIS            | ATCC           |
| <i>Bacteroides fragilis</i> 638R                             | basal/BHIS            | lab collection |
| <i>Parabacteroides merdae</i> CL03T12C32                     | basal/BHIS            | Comstock Lab   |
| <i>Parabacteroides johnsonii</i> CL02T12C29                  | basal/BHIS            | Comstock Lab   |
| <i>Parabacteroides goldsteinii</i> CL02T12C30                | basal/BHIS            | Comstock Lab   |
| <i>Prevotella melaninogenica</i> D18                         | TSB-A/TSA-A           | BEI            |
| <i>Prevotella denticola</i> F0289, Oral Taxon 291            | TSB-A/TSA-A           | BEI            |
| <i>Prevotella nigrescens</i> F0103                           | TSB-A/TSA-A           | BEI            |
| <i>Prevotella histicola</i> F0411                            | TSB-A/TSA-A           | BEI            |
| <i>Prevotella oralis</i> HGA0225                             | TSB-A/TSA-A           | BEI            |
| <i>Prevotella bivia</i> DNF00188                             | TSB-A/TSA-A           | BEI            |
| <i>Prevotella veroralis</i> F0319                            | TSB-A/TSA-A           | BEI            |
| <i>Prevotella intermedia</i> str. 17                         | TSB-A/TSA-A           | lab collection |
| <i>Prevotella copri</i> DSM 18205                            | TSB-A/TSA-A           | DSM            |
| <i>Porphyromonas gingivalis</i> W83                          | TSB-A/TSA-A           | lab collection |
| <i>Sphingobacterium spiritovorum</i> ATCC 33861              | BHIS                  | ATCC           |
| <i>Sphingobacterium multivorum</i> ATCC 35656                | BHIS                  | ATCC           |
| <i>Flavobacterium johnsoniae</i> ATCC 17061                  | BHIS                  | ATCC           |
| <i>Elizabethkingia meningoseptica</i> ATCC 13253             | BHIS                  | ATCC           |
| <i>Escherichia coli</i> HS                                   | BHIS                  | lab collection |
| <i>Lactobacillus rhamnosus</i> LMS2-1                        | BHIS                  | BEI            |
| <i>Bifidobacterium breve</i> EX336960VC18                    | BHIS                  | BEI            |
| <i>Enterococcus faecium</i> 503                              | basal/BHIS            | BEI            |
| <i>Salmonella enterica</i> Typhimurium ATCC 14028            | BHIS                  | ATCC           |
| Enteropathogenic <i>E. coli</i> 2348/69                      | BHIS                  | lab collection |
| <i>Vibrio cholerae</i> N16961                                | BHIS                  | lab collection |
| <i>Staphylococcus aureus</i> 502A                            | TSA-A                 | J. Lee         |
| <i>Clostridium difficile</i> NAP07                           | BHIS                  | BEI            |
| <i>Listeria monocytogenes</i> 104035                         | BHIS                  | M. Waldor      |
| <i>Escherichia coli</i> DH5 $\alpha$                         | LB                    | lab collection |
| <i>Escherichia coli</i> BL21/DE3                             | LB                    | lab collection |
| <i>Escherichia coli</i> S17 $\lambda$ pir                    | LB                    | E. Martens     |

**Supplementary Table 2. Primers used in this study.**

| Purpose                            | Primer Sequence <sup>a</sup>                               | Orientation         |
|------------------------------------|------------------------------------------------------------|---------------------|
| Sequence out of pYT646 junction    | GACTTGGATACCTCACGCC                                        |                     |
| Cloning of EH213_01845             | AACGGGATCCATAGCAAAACTTCATGCGTAGCAA                         | Forward             |
|                                    | TTCAGGATCCCGGGACAAAACCTTTGTTGCTTACTT                       | Reverse             |
| Cloning of EH213_01844             | TTTTGGATCCGGAATAATAACAACCTTTATTGGTTTT                      | Forward             |
|                                    | GTCAGGATCCATTTACCTACTGGTTAGTTGCACTG                        | Reverse             |
| Cloning of EH213_01843             | TTATGGATCC GTAAAGCCAATTGATGGTATATCTCTTTTATT                | Forward             |
|                                    | TCGCGGATCCTGTTGCGTAAATACTTTCTTCGCT                         | Reverse             |
| Deletion of EH213_01845            | CATAGGATCCGATATTCGCCGCTTTTCATTCTAC                         | left flank forward  |
|                                    | TGGTACGCGTTCAAATATTAAGTTTTCCAGTATGGT                       | left flank reverse  |
|                                    | TTTTACGCGTTCATACGGTATTGGTTTTGTGTTTT                        | right flank forward |
|                                    | AGTTGGATCCTTTATGGATGCTTGAAGAATTTGA                         | right flank reverse |
| Deletion of EH213_01844            | AGAGGGATCCATACAGGGAAATACGGATTTGAGA                         | left flank forward  |
|                                    | TTCAACGCGTGGGACAAAACCTTTGTTGCTTACTT                        | left flank reverse  |
|                                    | AATAACGCGTCAGTGCAACTAACCAGTAGGTAATAA                       | right flank forward |
|                                    | AATAGGATCCACCGATCCGACCAAATATAGATAA                         | right flank reverse |
| Deletion of EH213_01843            | AGTGGATCCCCCGGGCTGCACCATACTGGGAACTTAATATTTG                | left flank forward  |
|                                    | TTAGTTGTTTTGTTGCAATACAATATTTTTTTCTATTC                     | left flank reverse  |
|                                    | TATTGCAACAAAACAACATAAAAAGTAATATGTAATGATATTAATATC           | right flank forward |
|                                    | CTTGATATCGAATTCCTGCAGACAACCAAATAAGCGAAG                    | right flank reverse |
| Cloning 1845-1842 into into pET16b | ACTTTAAGAAGGAGATATAC                                       | Forward             |
|                                    | ATGCGTAGCAAGAAATATAAAAAATATATTTTG                          |                     |
|                                    | CTGTGATGATGATGATGATGATGATGATGATGGCC<br>AATCGTCATAGCAACCAAC | Reverse             |

<sup>a</sup> Restriction sites used for cloning are underlined
