# Supplementary material for: A family of anti-Bacteroidales peptide toxins wide-spread in the human gut microbiota
Source: PubMed Central journal article supplement (PMC6671954; doi:10.1038/s41467-019-11494-1), 2019-08-01
Supplement: 41467_2019_11494_MOESM2_ESM.pdf [file 41467_2019_11494_MOESM2_ESM.pdf]

### **Description of Additional Supplementary Files**

File Name: Supplementary Data 1

Description: Human gut metagenomes of the 3CGC collection that contain the bacteriocin A (bacteriocin A tab) or the bacteriocin B (bacteriocin B tab) gene.

File Name: Supplementary Data 2

Description: Similarity matrices of each of the bacteriocin-related protein families (bacteriocins, non-redundant bacteriocins, TM proteins, thiol oxidoreductases, and ABC transporters) with each other.
